# Supplementary material for: In situ bone regeneration enabled by a biodegradable hybrid double-network hydrogel
Source: Royal Society of Chemistry journal article supplement (doi:10.1039/c9bm00561g), 2019-01-01
Supplement: c9bm00561g1.pdf [file c9bm00561g1.pdf]

## Supporting Information

### ***In Situ* Bone Regeneration Enabled by a Biodegradable Hybrid Double-Network Hydrogel**

Yuanhao Zhang<sup>#a</sup>, Mingjiao Chen<sup>#b</sup>, Jia Tian<sup>a</sup>, Ping Gu<sup>b</sup>, Hongliang Cao<sup>a</sup>, Xianqun Fan<sup>\*b</sup> and Weian Zhang<sup>\*a</sup>

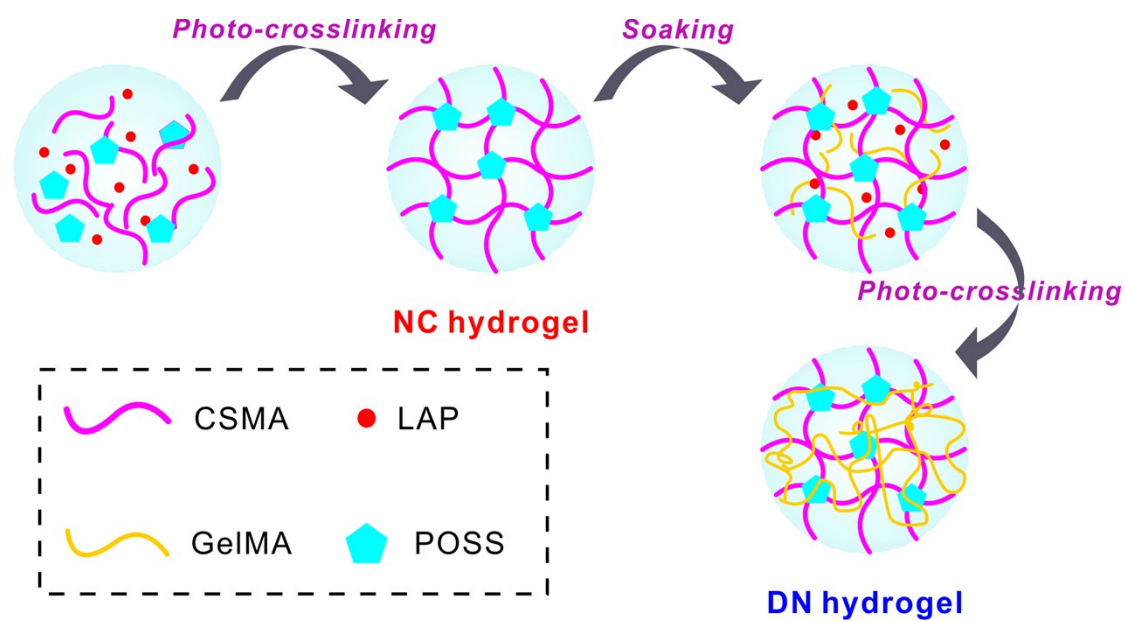

**Fig. S1** The biodegradable hybrid DN hydrogel prepared *via* two-step photo-crosslinking process.

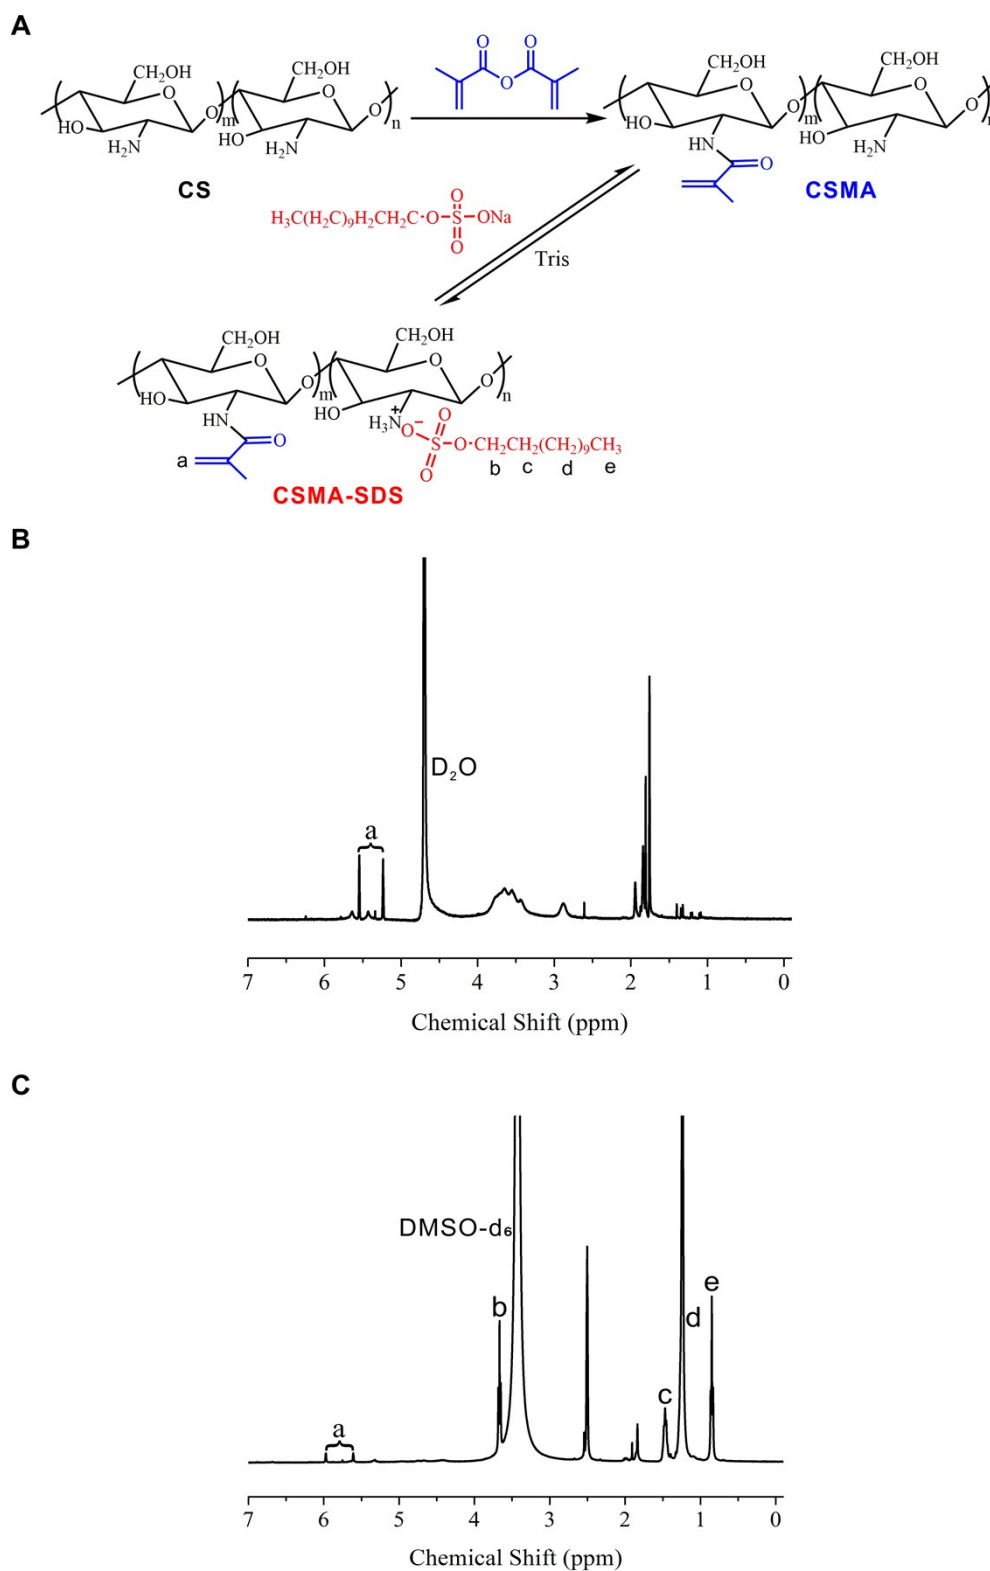

**Fig. S2** Preparation and characterization of CSMA and CSMA-SDS. A) Synthesis routine of CSMA and CSMA-SDS; B)  $^1\text{H}$ -NMR spectrum of CSMA in  $\text{D}_2\text{O}$ . The present of new peaks located at 5.6 and 6.0 ppm attribute to the methylene protons of methacrylate. C)  $^1\text{H}$ -NMR spectrum of CSMA-SDS in  $\text{DMSO-d}_6$ . The peaks at 0.86, 1.25, 1.49 and 3.69 ppm are the characteristic alkyl chain peaks of SDS.

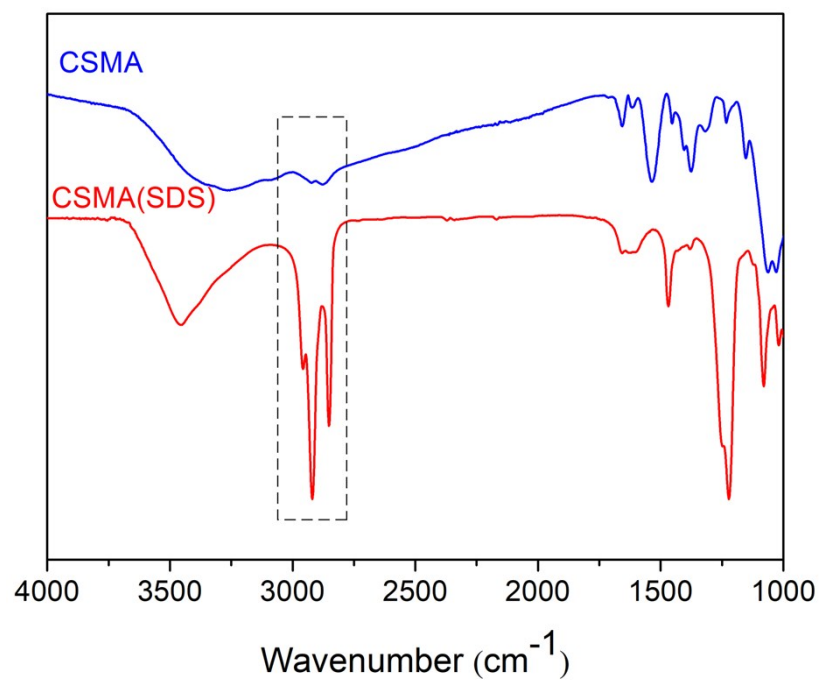

**Fig. S3** FT-IR spectra of CSMA and CSMA-SDS. The strengthened intensity of absorption band at 2835-2965  $\text{cm}^{-1}$  (dashed box) attributes to the stretch mode of methylene of SDS.

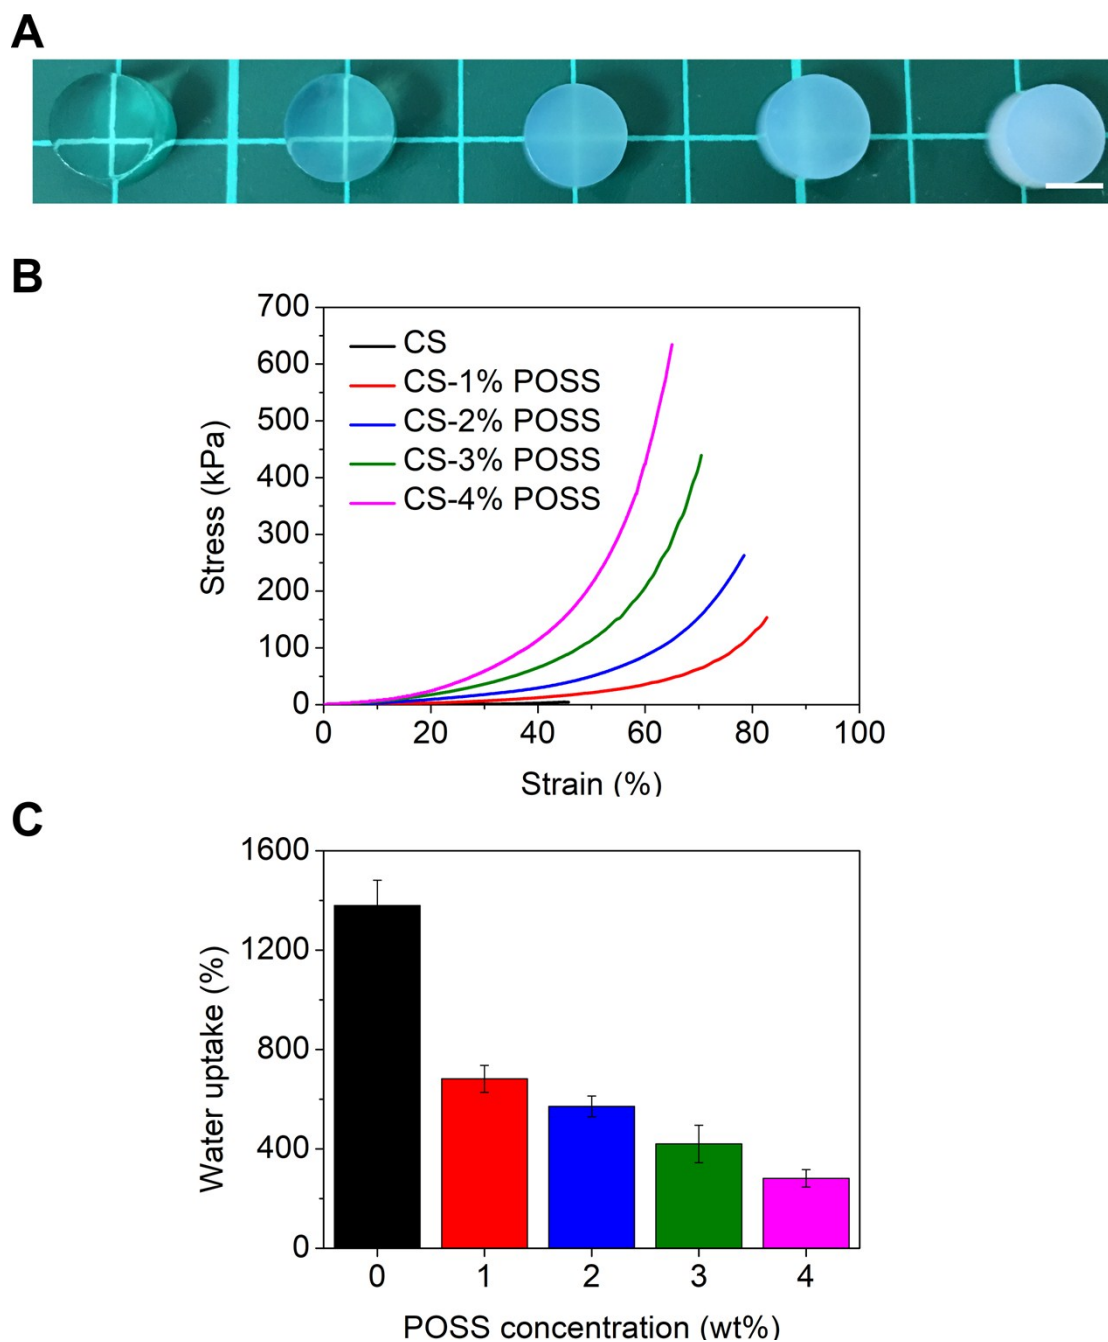

**Fig. S4** Characterization of CS-POSS hybrid hydrogels. A) Optical images of hydrogels with different POSS concentration. They are CS, CS-1% POSS, CS-2% POSS, CS-3% POSS and CS-4% POSS from left to right, respectively. The scale bar is 5 mm. B) Compression curves of hydrogels. C) Water uptake (%) of freeze-dried hydrogels in PBS.

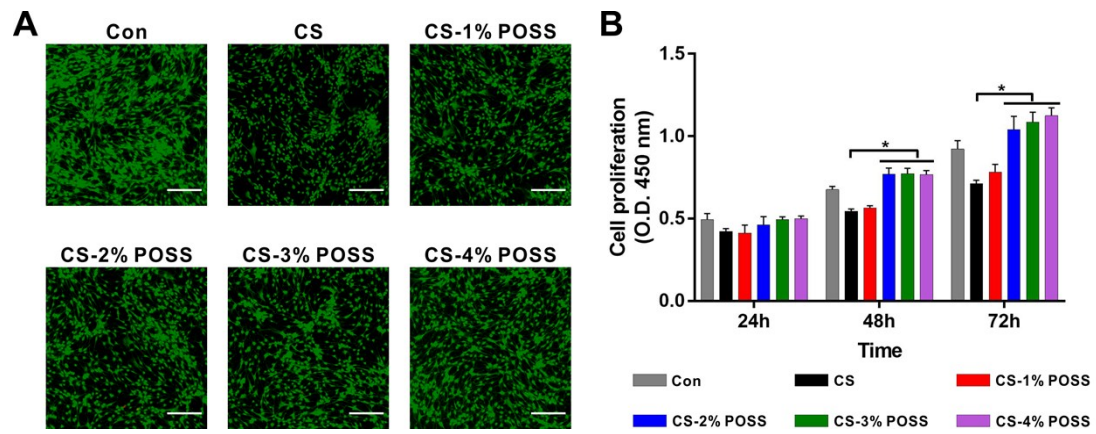

**Fig. S5** Cell behaviors on CS-POSS hydrogels. A) Live/dead staining of MSCs for 3 days. Live cells are green and dead cells are red. The scale bar is 500  $\mu$ m. B) Cell proliferation on hydrogels for 3 days. \* $p < 0.05$ .

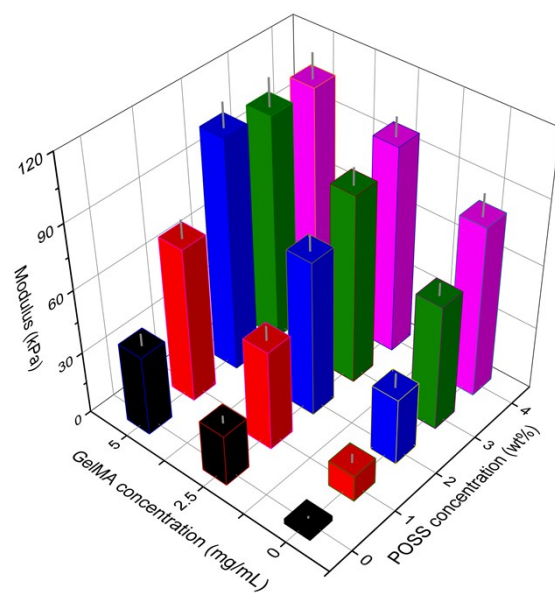

**Fig. S6** Compression modulus of DN hydrogels with different POSS and GelMA concentration.

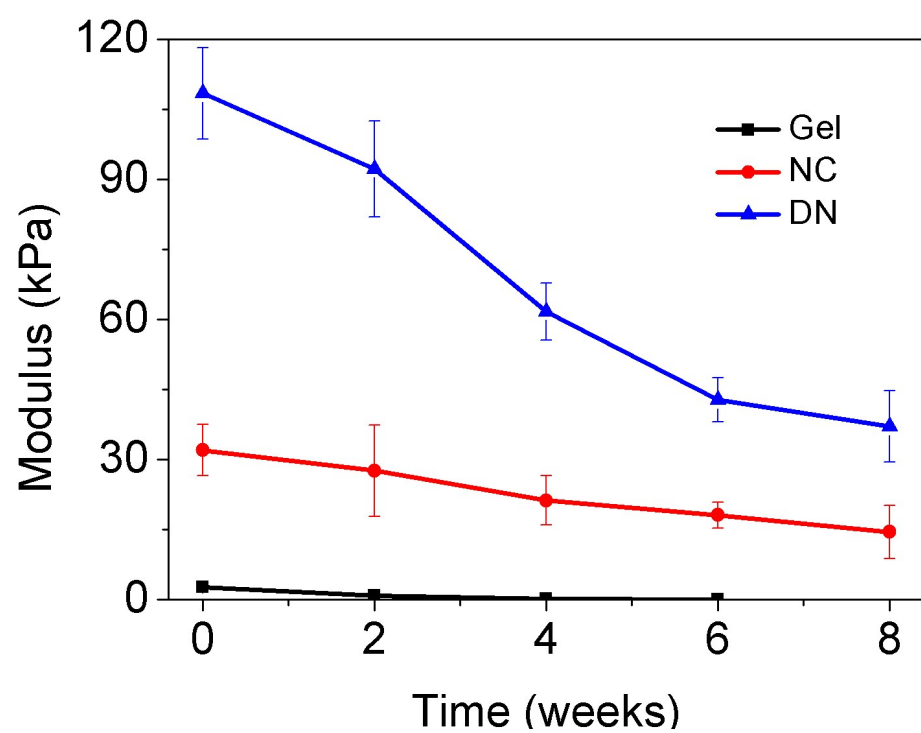

**Fig. S7** The decline of modulus of hydrogels in the degradation medium during 8 weeks.



## Gel

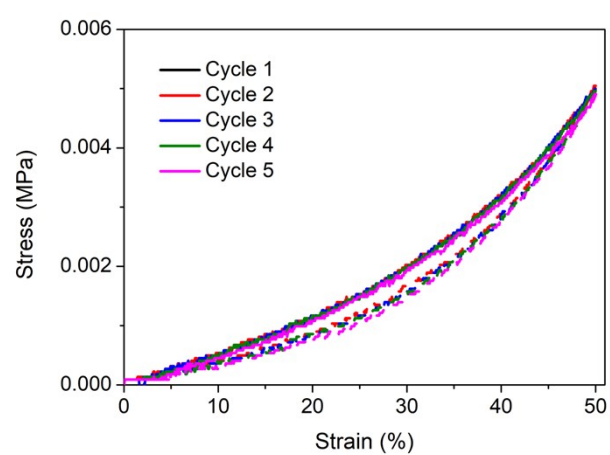

## NC

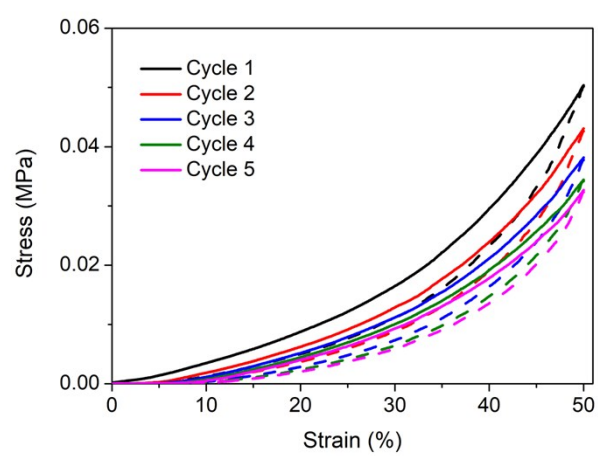

**Fig. S8** Stress-strain curves of Gel and NC hydrogels under cyclic compression with a peak strain of 50%.

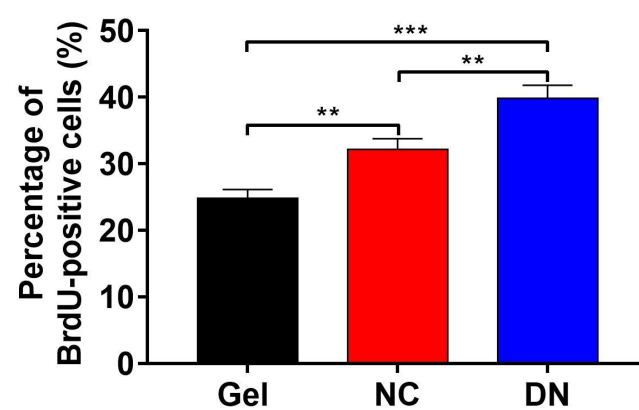

**Fig. S9** The percentage of BrdU-positive cells. \* $p < 0.05$ , \*\* $p < 0.01$  and \*\*\* $p < 0.001$ .

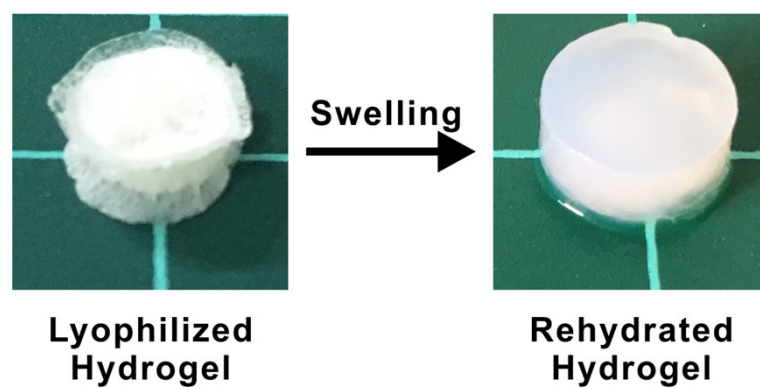

**Fig. S10** Images of lyophilized and rehydrated DN hydrogel.

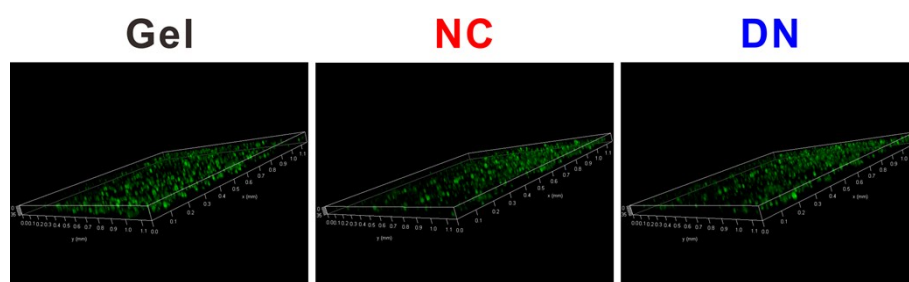

**Fig. S11** The cell viability in hydrogels after incubation of 24 h.

**Table S1 Summary of the physical properties of hydrogels.**

| <b>Properties</b>              | <b>Gel hydrogel</b> | <b>NC hydrogel</b> | <b>DN hydrogel</b> |
|--------------------------------|---------------------|--------------------|--------------------|
| Porosity (%)                   | 91 ± 5              | 87 ± 2             | 76 ± 4             |
| Water content (%) <sup>a</sup> | 92.3/85.7           | 85.1/79.5          | 89.8/87.5          |
| Modulus (kPa) <sup>b</sup>     | 2.6 ± 0.6           | 32.0 ± 5.5         | 108.5 ± 9.8        |

<sup>a</sup> water content ratio before and after centrifugation. <sup>b</sup> measured in compression.

**Table S2** Primers and parameters used for the qPCR analysis

| Gene Name | Accession No. | Primer sequence                                                              | Annealing temperature (°C) | Product size (base pairs) |
|-----------|---------------|------------------------------------------------------------------------------|----------------------------|---------------------------|
| BSP       | NM_004967     | Forward:5'-CACTGGAGCCAATGCAGAAGA-3'<br>Reverse:5'-TGGTGGGGTTGTAGGTTCAAA-3'   | 60                         | 106                       |
| Runx2     | NM_001015     | Forward:5'-TGGTTACTGTCATGGCGGGTA-3'<br>Reverse:5'-TGGTTACTGTCATGGCGGGTA -3'  | 60                         | 101                       |
| OSX       | NM_152860     | Forward:5'-CCTCTGCGGGACTCAACAAC-3'<br>Reverse:5'-AGCCCATTAGTGCTTGTAAGG-3'    | 60                         | 128                       |
| OPN       | NM_001251     | Forward:5'-CTCCATTGACTCGAACGACTC-3'<br>Reverse:5'-CAGGTCTGCGAACTTCTTAGAT-3'  | 60                         | 230                       |
| Col1A1    | NM_000088     | Forward:5'-GAGGGCCAAGACGAAGACATC-3'<br>Reverse: 5'-CAGATCACGTCATCGCACAAAC-3' | 60                         | 140                       |
| GAPDH     | NM_001256     | Forward:5'-GGAGCGAGATCCCTCCAAAAT-3'<br>Reverse:5'-GGCTGTTGTCATACTTCTCATGG-3' | 60                         | 197                       |
